# Supplementary material
Source: PubMed Central journal article supplement (PMC4768487)
Supplement: NIHMS750734-supplement-sup1.pdf [file NIHMS750734-supplement-sup1.pdf]

# Supplemental Figure 1

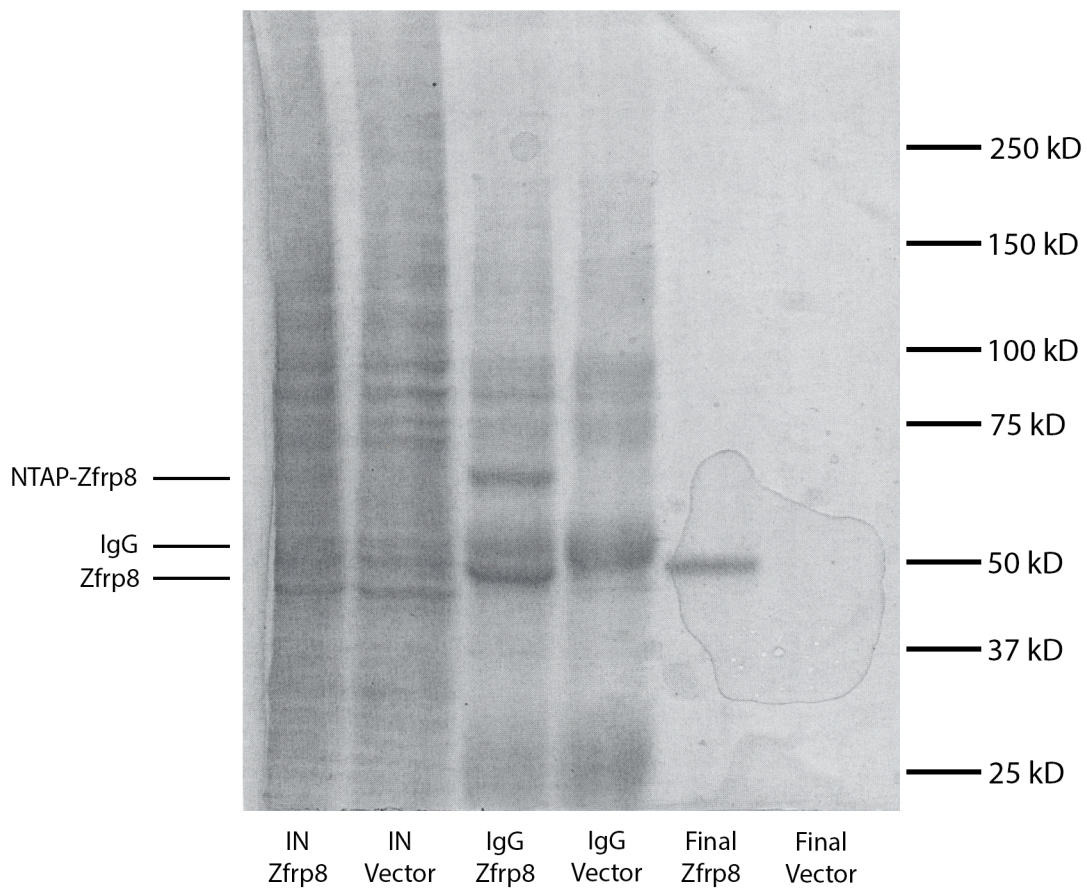

# Supplemental Figure 2

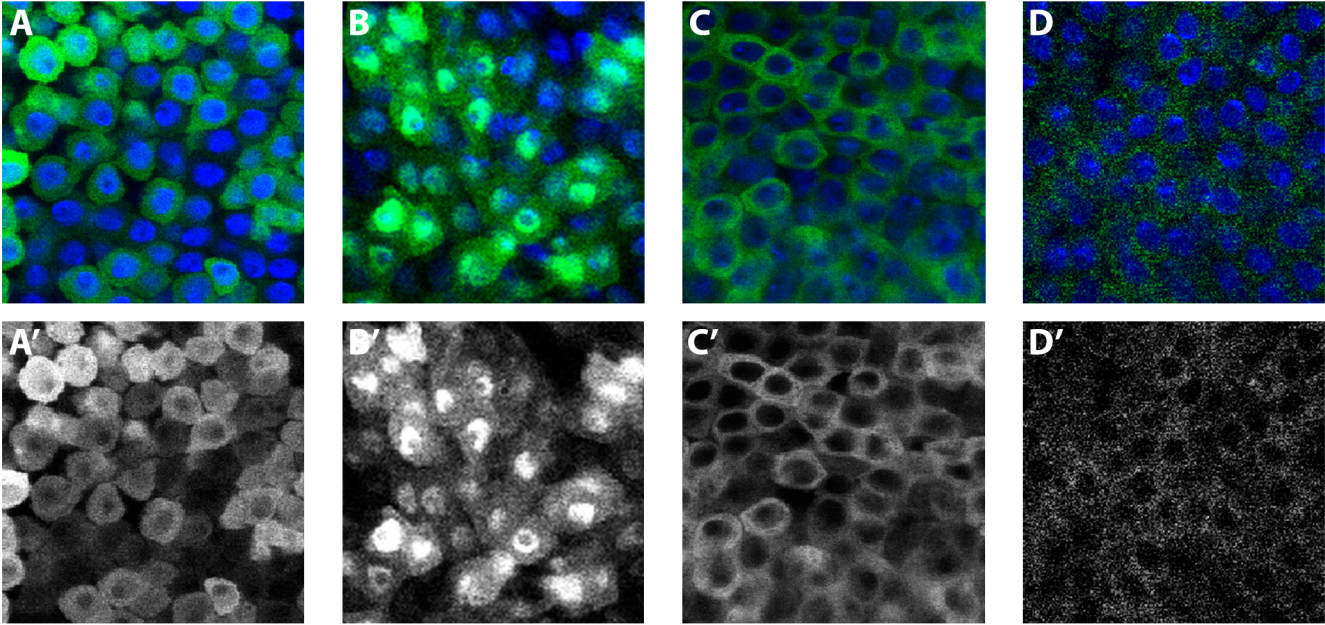

# Supplemental Figure 3

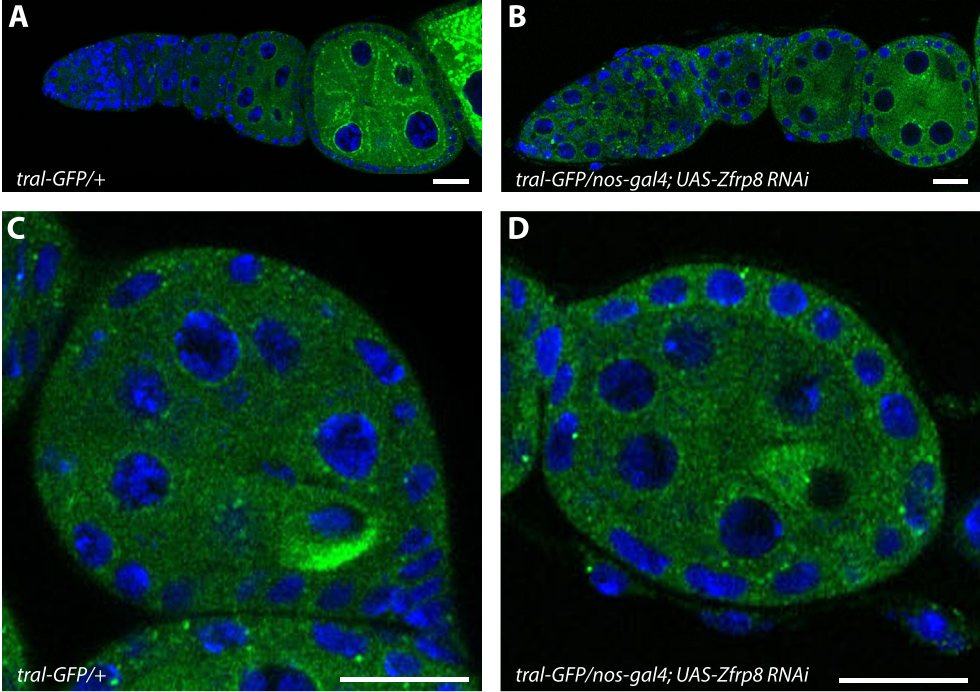

DNA Tral-GFP

# Supplemental Table 1: PDCD2 interactors identified by yeast-two hybrid screen of a mESC library

| Symbol | Protein                                                            | Drosophila Ortholog                                                   | # of Clones Identified |
|--------|--------------------------------------------------------------------|-----------------------------------------------------------------------|------------------------|
| Alms1  | Alstrom syndrome 1 homolog                                         |                                                                       | 1                      |
| Atp1b3 | ATPase, Na+/K+ transporting, beta 3 polypeptide                    | Nervana 1                                                             | 1                      |
|        | Developmental pluripotency-associated protein 4                    |                                                                       | 1                      |
| Ibtk   | Inhibitor of Bruton agammaglobulinemia tyrosine kinase             | CG8060                                                                | 1                      |
| Ipo9   | Importin-9                                                         | Ranbp9                                                                | 1                      |
| Kans12 | KAT8 regulatory NSL complex subunit 2                              | Dim y-tubulin 1                                                       | 1                      |
| Nmd3   | 60S ribosomal export protein NMD3                                  | Nonsense-mediated mRNA 3                                              | 1                      |
| Nufip1 | Nuclear fragile-X mental retardation protein-interacting protein 1 | Nufip                                                                 | 3                      |
| Pcmt2  | Protein-L-isoaspartate O-methyltransferase domain containing 2     | Protein-L-isoaspartate O-methyltransferase                            | 1                      |
| Ppm1d  | Protein phosphatase 1D                                             | Protein phosphatase 2C                                                | 2                      |
| Rbm39  | RNA binding motif protein 39                                       | CG11266                                                               | 1                      |
| Rnf2   | E3 ubiquitin-protein ligase RING2                                  | Sex combs extra                                                       | 1                      |
| Rpl12  | 60S ribosomal protein L12                                          | Ribosomal protein L12                                                 | 1                      |
| Spg21  | Spastic paraplegia 21 homolog                                      |                                                                       | 1                      |
| Stx7   | Syntaxin 7                                                         | Syntaxin 7                                                            | 1                      |
| Taf1b  | TATA box-binding protein-associated factor 1B                      | TATA box-binding protein-associated factor RNA polymerase I subunit B | 1                      |
| Tardbp | TAR DNA binding protein                                            | TAR DNA-binding protein-43 homolog                                    | 1                      |
| Tet1   | Methylcytosine dioxygenase TET1                                    | CG43444                                                               | 2                      |
| Zfp623 | Zinc Finger Protein 623                                            |                                                                       | 1                      |

## Supplemental Table 2: Zfrp8 is required in the nucleus

| Expressed Protein            | Rescue | Adult Viability | Progeny Counted |
|------------------------------|--------|-----------------|-----------------|
| GFP-Zfrp8                    | +      | 50%             | n= 398          |
| GFP-NLS-Zfrp8                | +      | 56%             | n= 424          |
| GFP-NES-Zfrp8                | -      | <3%             | n= 344          |
| CD8-GFP-Zfrp8                | -      | <3%             | n= 368          |
| <i>Zfrp8</i> <sup>null</sup> | -      | <3%             | n= 100          |
